# Supplementary material
Source: PubMed Central journal article supplement (PMC6943703)
Supplement: izz174_suppl_supplementary-figure-1.pdf [file izz174_suppl_supplementary-figure-1.pdf]

## SUPPLEMENTARY FIGURES & TABLE

**Supplementary Figure 1. DOP treatment inhibits S1P lyase activity.** A, The S1P enzymatic pathway. B, Chemical structure of DOP. C, SPL activity in ileum of TNF $\Delta$ ARE mice administered DOP or vehicle in drinking water for 2 weeks. D, mRNA expression of SPL in ileum of TNF $\Delta$ ARE mice receiving DOP or vehicle for 2 weeks (Data are expressed as mean  $\pm$  SEM; n=4 mice/group; \* $P$ <0.05 by two-tailed  $t$ -test.)

**Supplementary Figure 2. Pyridoxine (Vitamin-B6)-deficient diet did not induce peripheral lymphopenia nor affected the severity of ileitis.** A, Gating strategy for live LP CD4+T, CD8+T and B cells. B, Percentage of indicated lymphocytes in peripheral blood of TNF $\Delta$ ARE mice treated with standard diet or pyridoxine-deficient diet for 2 weeks. C, Total inflammatory index of TNF $\Delta$ ARE ileum receiving standard or pyridoxine-deficient diet fed mice. (Data are expressed as mean  $\pm$  SEM;  $n \geq 10$  mice/group).

**Supplementary Figure 3. DOP induced peripheral lymphopenia in mice with chronic ileitis and down regulated S1PR1 expression on circulating T and B cells.** A, B, Percentage and absolute counts of CD4 and CD8+ (total and subsets) in peripheral blood of S1P-eGFP reporter TNF $\Delta$ ARE mice treated with DOP or vehicle for 2 weeks. C, D, S1PR1 expression (median fluorescent intensity, MFI) of CD4+, CD8+T cells, and B220+ B cells from blood of TNF $\Delta$ ARE mice treated with DOP or vehicle control. (Data are expressed as mean  $\pm$  SEM;  $n \geq 7$  mice/group; \* $P$ <0.05, \*\* $P$ <0.01, \*\*\* $P$ <0.001 by two-tailed  $t$ -test).

**Supplementary Figure 4. DOP treatment for 1 week induced lymphopenia but did not affect the severity of ileitis in TNF $\Delta$ ARE mice.** A, Percentages and absolute counts of indicated lymphocyte subsets in peripheral blood of TNF $\Delta$ ARE mice treated with DOP or vehicle control. B, Inflammatory histopathological indices of ileitis severity of TNF $\Delta$ ARE of DOP- and vehicle-treated control mice. C, Representative micrographs. (Data are expressed as mean  $\pm$  SEM;  $n=5$  mice/group, \*\* $P$ <0.01 by two-tailed  $t$ -test).

**Supplementary Figure 5. Mass cytometry analyses of the effects of SPL inhibition on leukocyte distribution within distinct immune compartments of mice with chronic ileitis.** A-E, Blood, MLN and ileum LP were harvested from control or DOP treated TNF $\Delta$ ARE mice, with cells from each tissue stained with a panel of 34 metal-conjugated antibodies and acquired on a Helios mass cytometer. Data depict PhenoGraph-defined cellular distribution and clustering within peripheral blood (panels A-E), F, J, MLN or K-O, ileum LP. Panels A, F and K show PhenoGraph-defined cellular distribution and clustering of all viable singlets

(defined as 191I<sup>r</sup>+ 193I<sup>r</sup>+ 195P<sup>t</sup>-), plotted according to tSNE1 and tSNE2, and colored by phenotype designation as noted. Panels B, G, and L quantify the relative frequencies of CD4<sup>+</sup>, CD8<sup>+</sup>, CD11b<sup>+</sup>, and CD19<sup>+</sup> cells among viable singlets. Panels C, H, and M show all viable T cells (defined as 191I<sup>r</sup>+ 193I<sup>r</sup>+ 195P<sup>t</sup>- CD3<sup>+</sup> MHCII<sup>-</sup>) subjected to the PhenoGraph algorithm, plotted according to tSNE1 and tSNE2, with panels according to protein expression for CD4, CD8, CD44, and CD62L. Panels D, I, and N show PhenoGraph-defined cellular phenotypes among T cells, plotted according to tSNE1 and tSNE2 and colored by the designated phenotype. Panels E, J, and O quantify the relative frequencies of T cell subsets. Statistical analysis done using an unpaired t test between control and DOP treated conditions, subjected to multiple testing correction, with statistical significance identified as follows: \*p<0.05, \*\*p<0.01, \*\*\*p<0.001, \*\*\*\*p<0.0001. No designation, not significant.

**Supplementary Figure 6. Effect of S1P lyase inhibition on thymic size.** Representative images of thymi from TNFΔARE mice treated with DOP (30 mg/L) or vehicle at indicated time points.

**Supplementary Table 1. CyTOF antibody staining panel epitopes, clones, suppliers, and isotope label.**

All Fluidigm antibodies were purchased pre-conjugated. All other supplier antibodies were purchased in a carrier-free format and conjugated with the respective metal isotope using the MaxPar-X8 Conjugation Kit (Fluidigm).

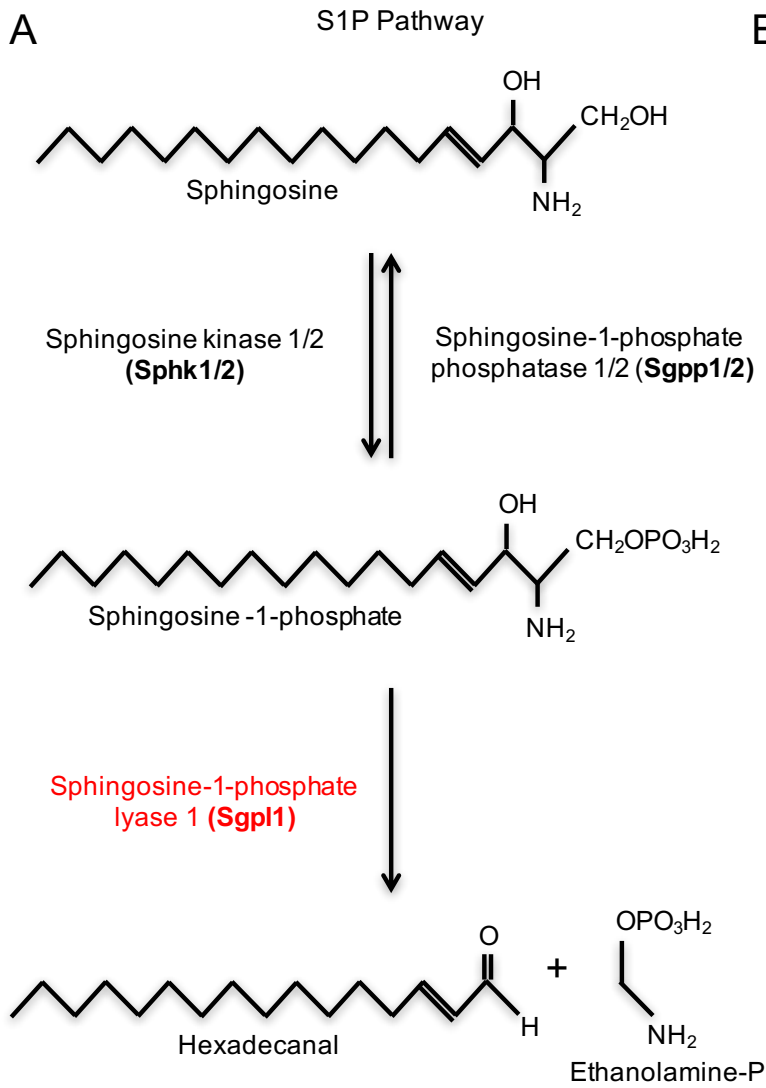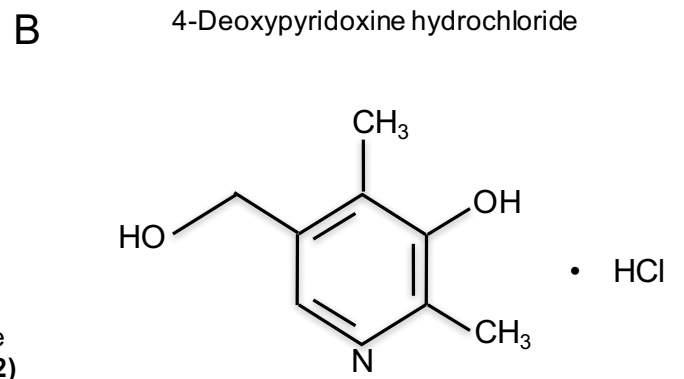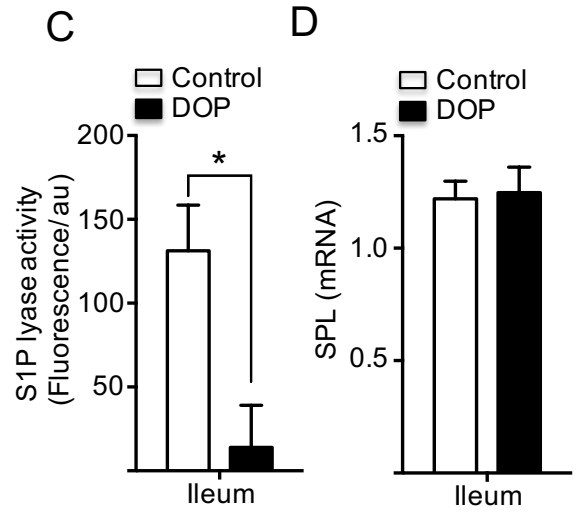

Supplementary Figure 1

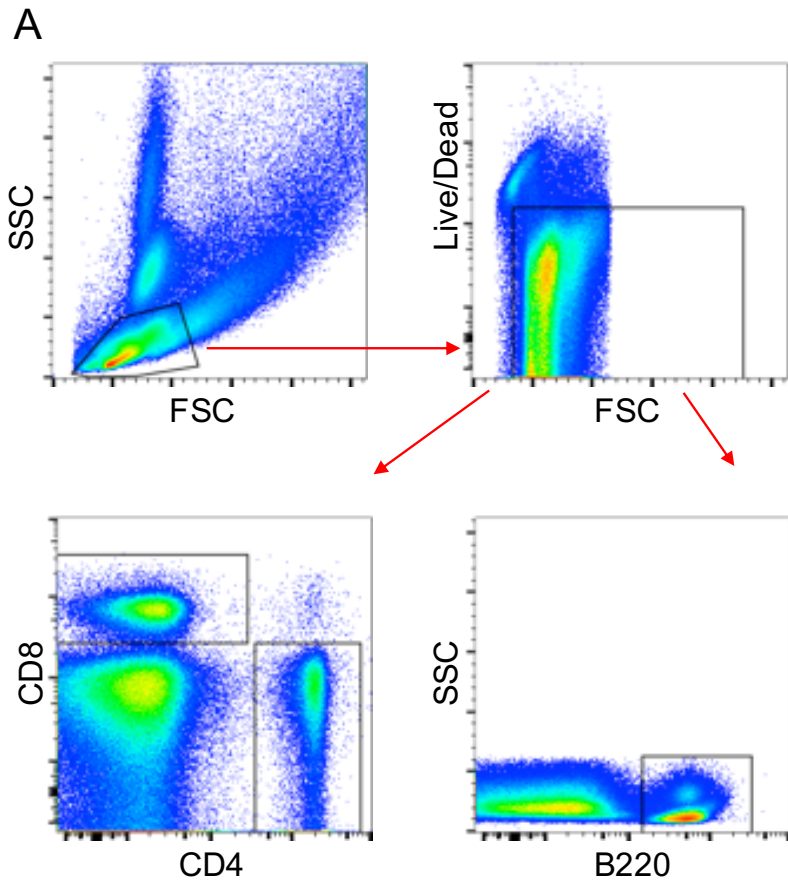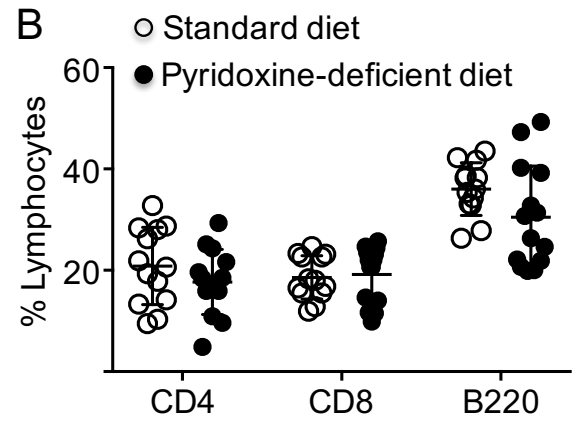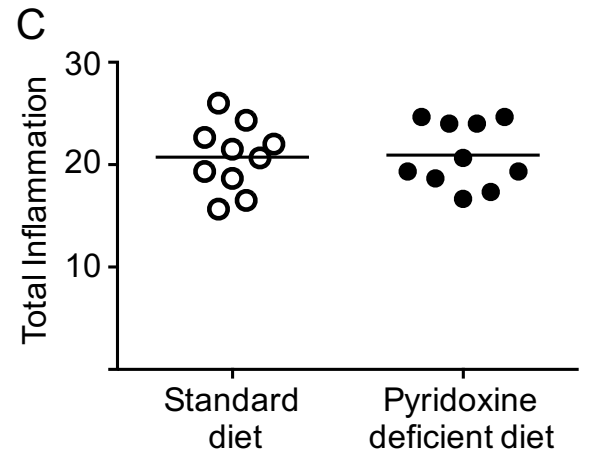

Supplementary Figure 2



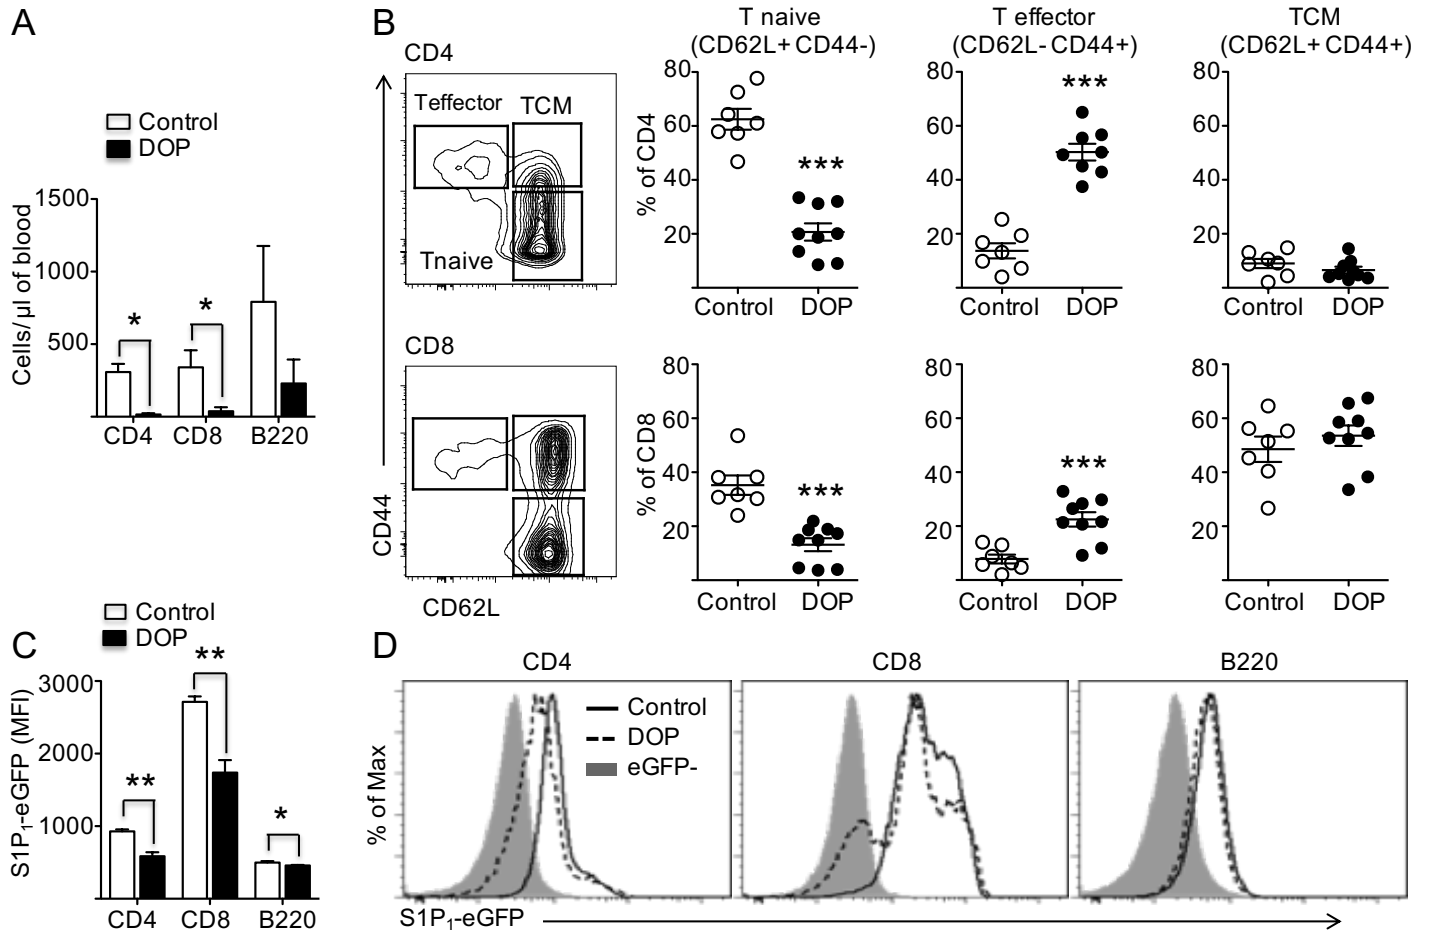

Supplementary Figure 3

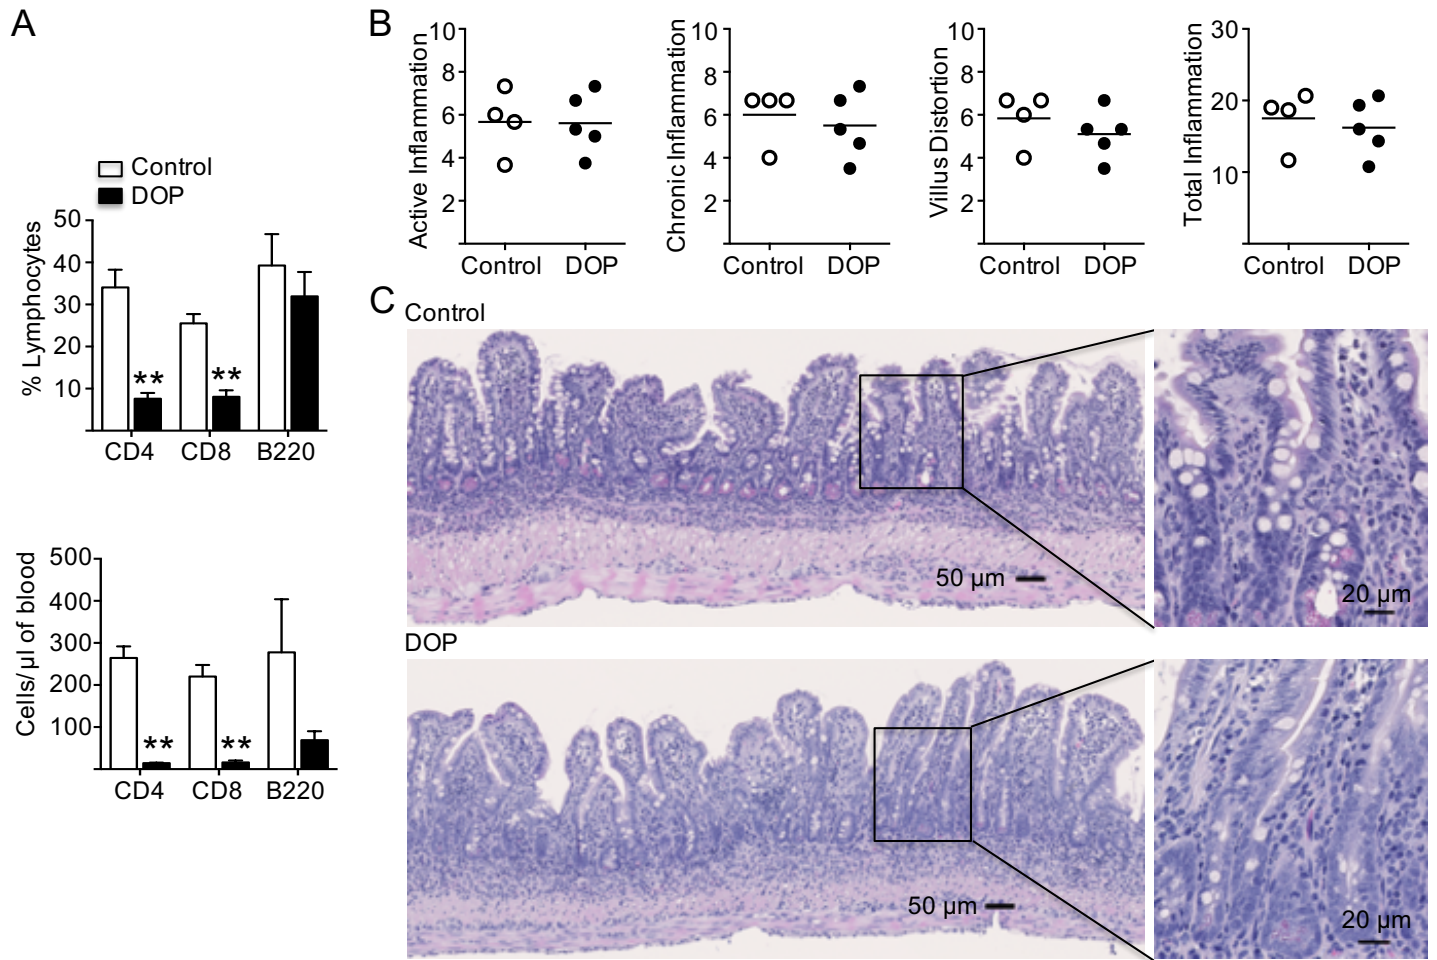

**Supplementary Figure 4**

**Blood**

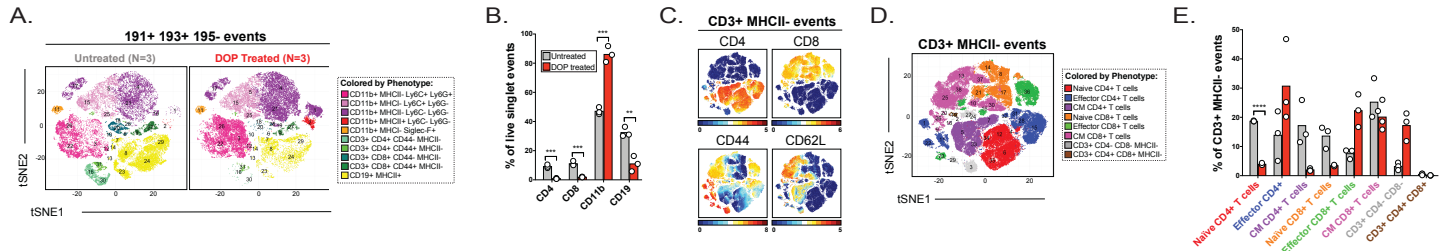

**MLN**

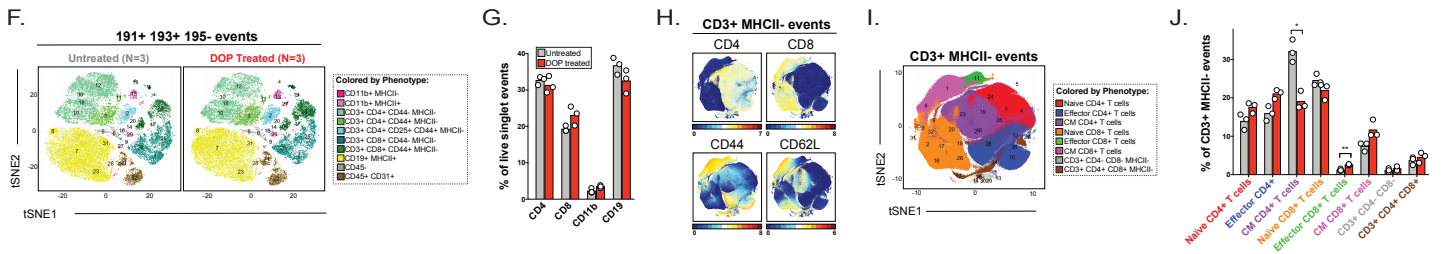

**Ileum LP**

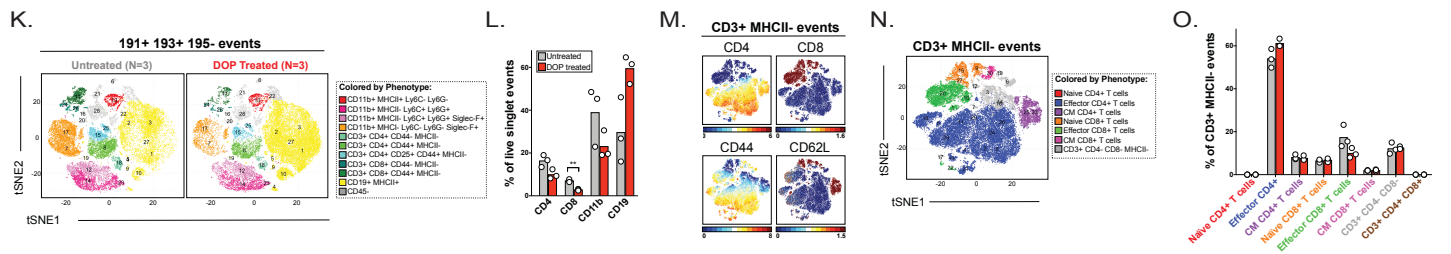

**Supplementary Figure 5**

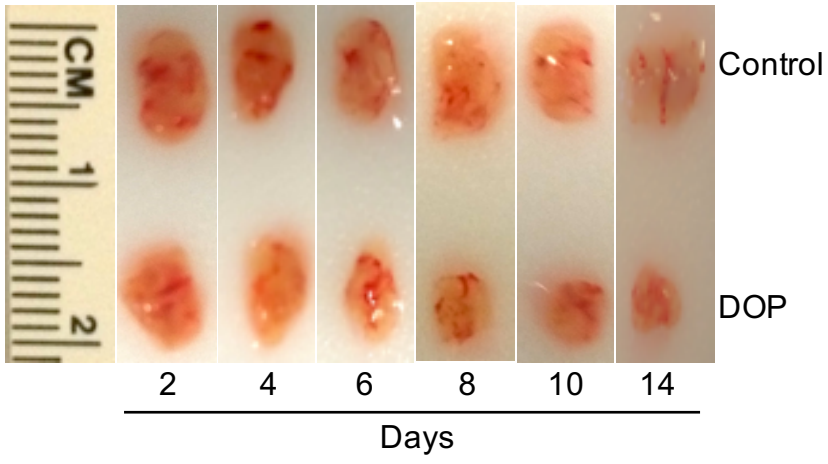

**Supplementary Figure 6**

| <b>Target epitope</b>    | <b>Clone</b> | <b>Supplier</b> | <b>Isotopic label</b> |
|--------------------------|--------------|-----------------|-----------------------|
| CD31 (PECAM-1)           | 390          | Fluidigm        | 165Ho                 |
| CD14                     | Sa14-2       | Fluidigm        | 156Gd                 |
| F4/80                    | BM8          | Fluidigm        | 146Nd                 |
| CD11b (Mac-1)            | M1/70        | Fluidigm        | 143Nd                 |
| DEC205                   | NLDC-145     | BioLegend       | 173Yb                 |
| I-A/I-E (MHC class II)   | M5/114.15.2  | Fluidigm        | 174Yb                 |
| ROR gamma (t)            | B2D          | Fluidigm        | 159Tb                 |
| CD45                     | 30-F11       | Fluidigm        | 89Y                   |
| CD127 (IL-7Ra)           | A7R34        | Fluidigm        | 175Lu                 |
| CD161 (NK1.1)            | PK136        | Fluidigm        | 170Er                 |
| CD335 (NKp46)            | 29A1.4       | Fluidigm        | 153Eu                 |
| CD40                     | HM40-3       | Fluidigm        | 161Dy                 |
| CD86                     | GL1          | Fluidigm        | 172Yb                 |
| CD11c                    | N418         | TONBO           | 115In                 |
| CD19                     | 6D5          | Fluidigm        | 149Sm                 |
| CD45R (B220)             | RA3-6B2      | Fluidigm        | 176Yb                 |
| Tbet                     | 4B10         | Fluidigm        | 160Gd                 |
| Foxp3                    | FJK-16s      | Fluidigm        | 158Gd                 |
| CD25 (IL-2R)             | 3C7          | BioLegend       | 169Tm                 |
| CD49d (Integrin alpha 4) | R1-2         | Fluidigm        | 151Eu                 |
| CD44                     | IM7          | Fluidigm        | 171Yb                 |
| CD62L (L-selectin)       | MEL-14       | Fluidigm        | 164Dy                 |
| CD8a                     | 53-6.7       | Fluidigm        | 168Er                 |
| CD4                      | RM4-5        | Fluidigm        | 145Nd                 |
| CD3e                     | 145-2C11     | Fluidigm        | 152Sm                 |
| CD29                     | HMβ1-1       | BioLegend       | 166Er                 |
| CCR9                     | 9B1          | BioLegend       | 155Gd                 |
| CD103                    | 2E7          | BioLegend       | 163Dy                 |
| Integrin b7              | FIB504       | Fluidigm        | 162Dy                 |
| Gata3                    | TWAJ         | Fluidigm        | 167Er                 |
| KLRG-1                   | 2F1          | TONBO           | 154Sm                 |
| SiglecF                  | E50-2440     | BD              | 147Sm                 |
| Ly-6G                    | 1A8          | Fluidigm        | 141Pr                 |
| Ly-6C                    | HK1.4        | Fluidigm        | 150Nd                 |

**Supplementary Table 1**
