# Supplementary material
Source: PubMed Central journal article supplement (PMC6943703)

# Blood

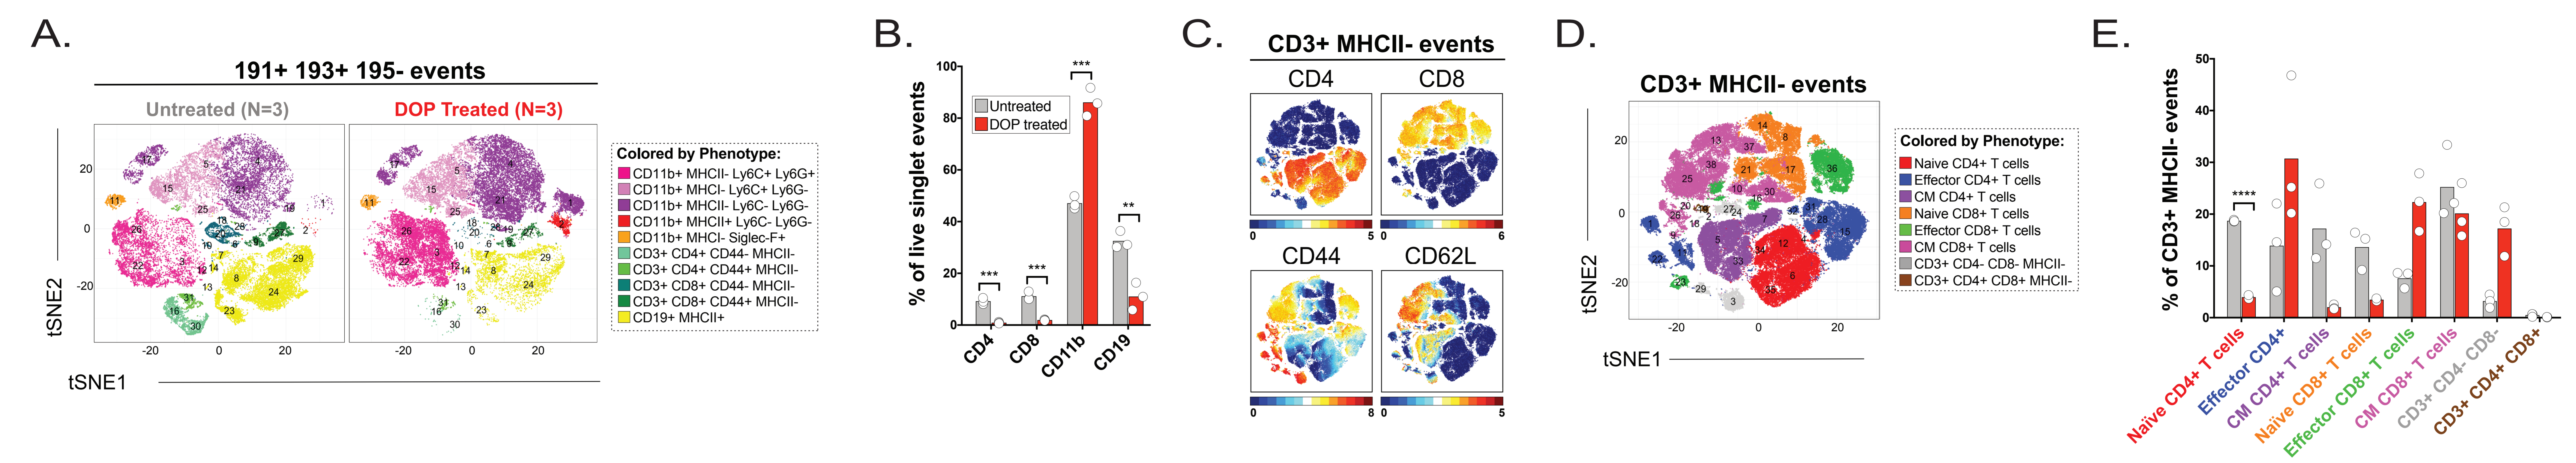

# MLN

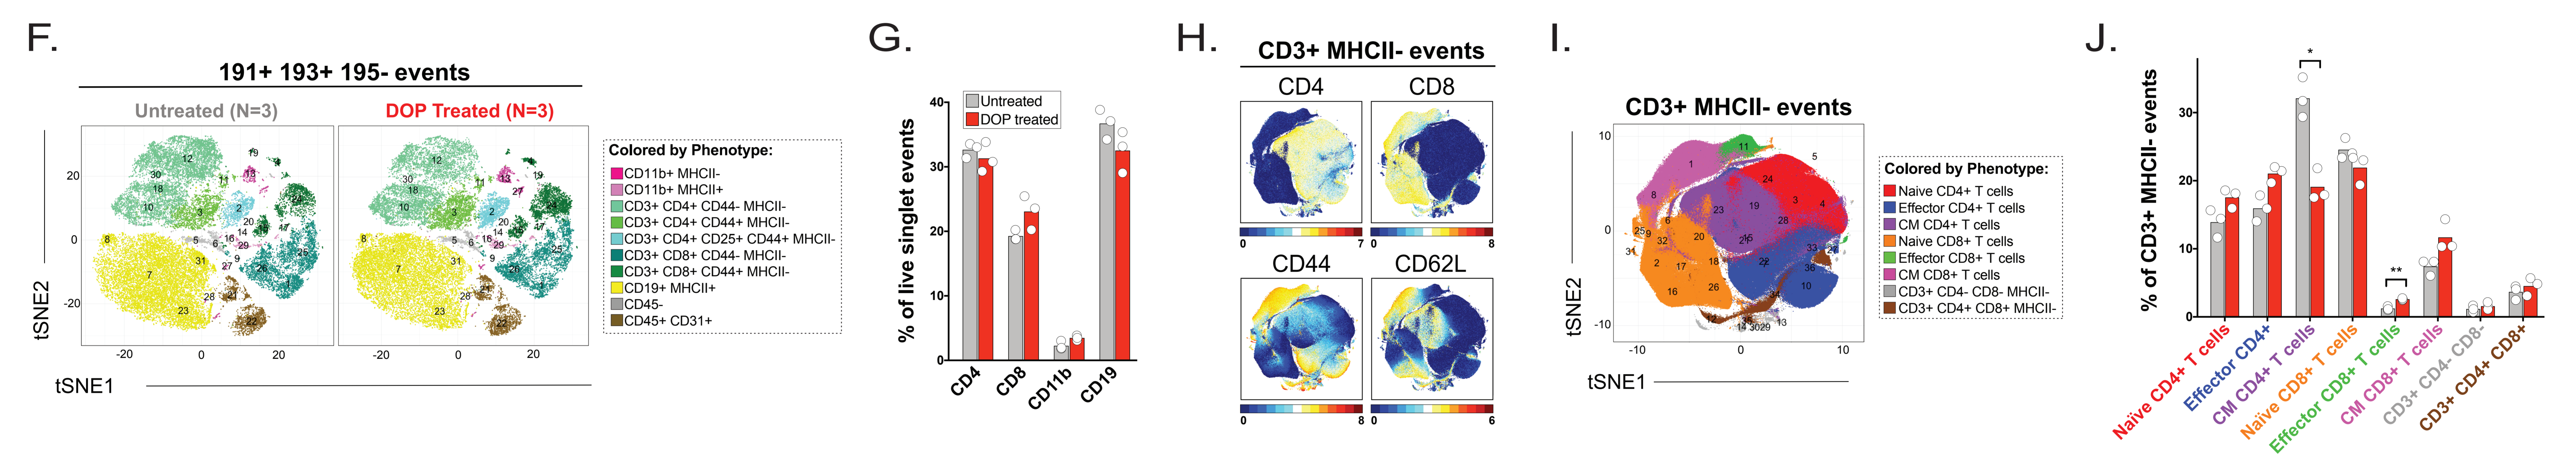

# Ileum LP

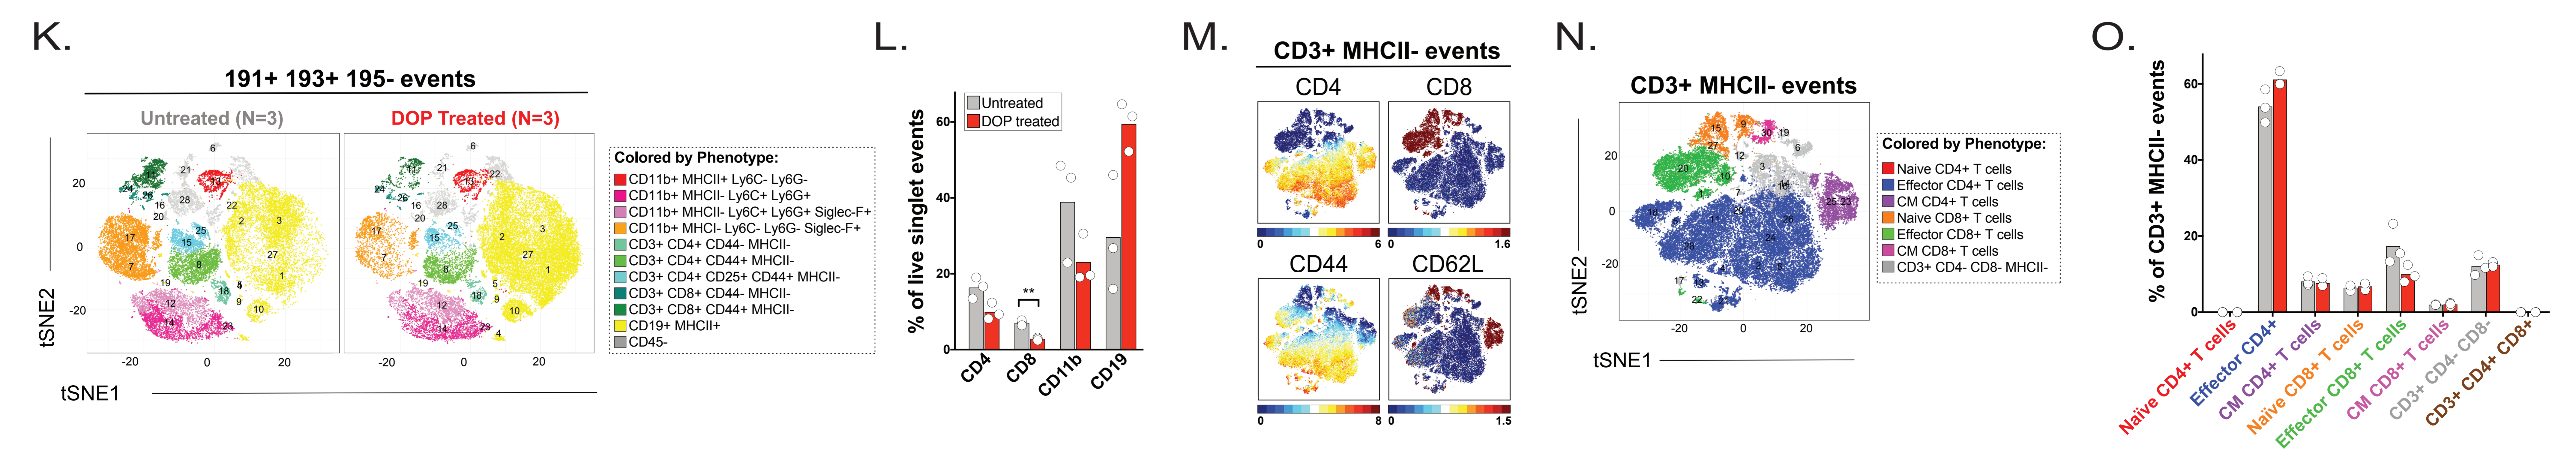

Supplement: izz174_suppl_supplementary-figure-2.pdf [file izz174_suppl_supplementary-figure-2.pdf]
